# Supplementary material for: A green adsorbent for the removal of BTEX from aqueous media
Source: Royal Society of Chemistry journal article supplement (doi:10.1039/c5ra24757h), 2016-01-01
Supplement: c5ra24757h1.pdf [file c5ra24757h1.pdf]

# Supplementary data

## A green adsorbent for the removal of BTEX from aqueous media

H. Shakeri<sup>1</sup>, M. Arshadi<sup>2,\*</sup>, J.W.L. Salvacion<sup>1</sup>

<sup>1</sup>Mapúa Institute of Technology, Muralla St. Intramuros, Manila 1002 Philippines

<sup>2</sup>Department of Chemistry, Shiraz Branch, Islamic Azad University, P.O. Box 71955-149 Shiraz, Fars,  
Iran

---

\* To whom correspondence should be addressed. Tel.: +989361528179.

E-mail: [m-arshadi@ch.iut.ac.ir](mailto:m-arshadi@ch.iut.ac.ir), [mohammadarshadi@yahoo.com](mailto:mohammadarshadi@yahoo.com), [moarshadi138@gmail.com](mailto:moarshadi138@gmail.com) (M. Arshadi)

Counts

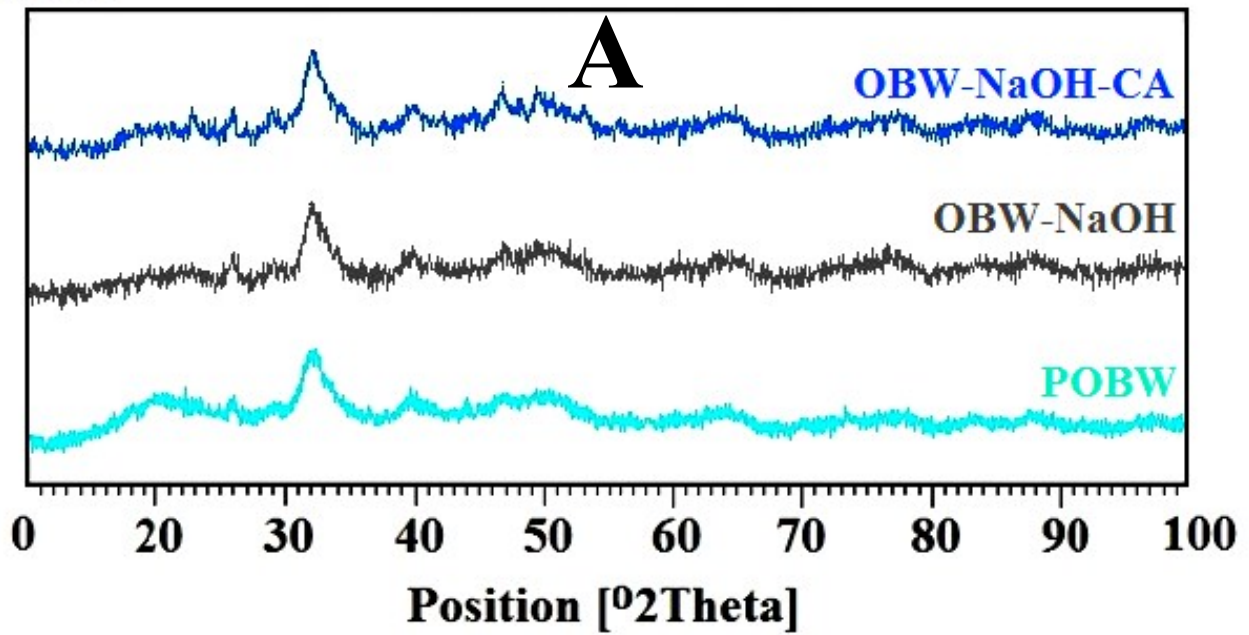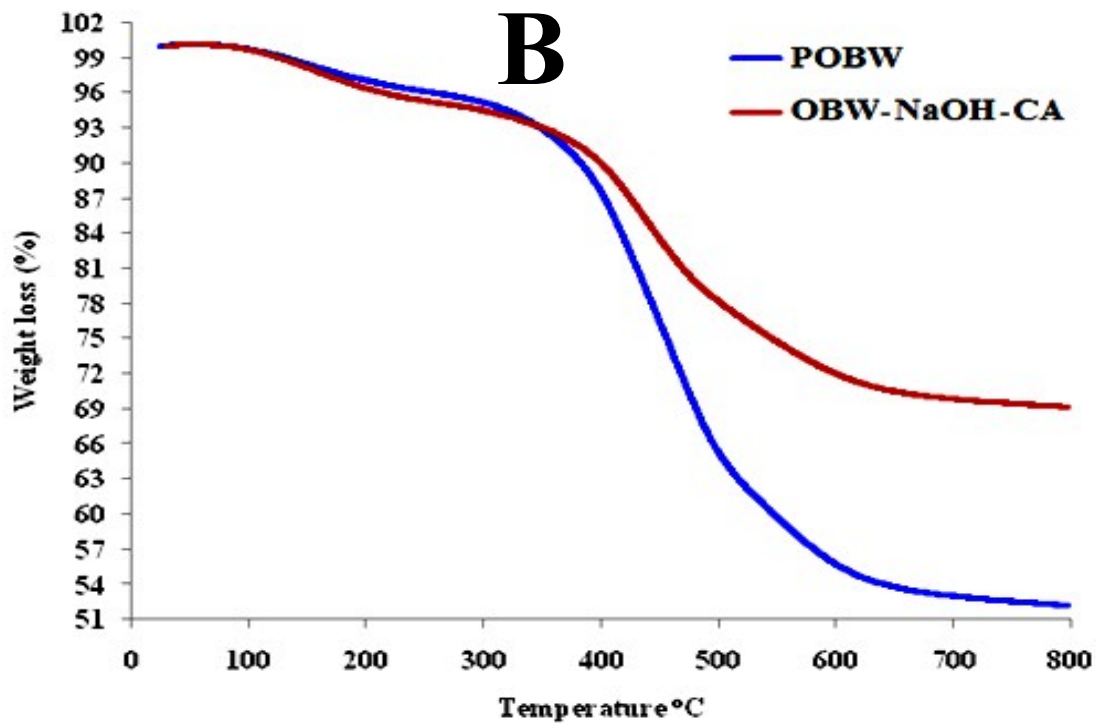

Fig. S1. Wide-range X-ray diffraction (A) and TGA curves (B) of the prepared biomaterials.

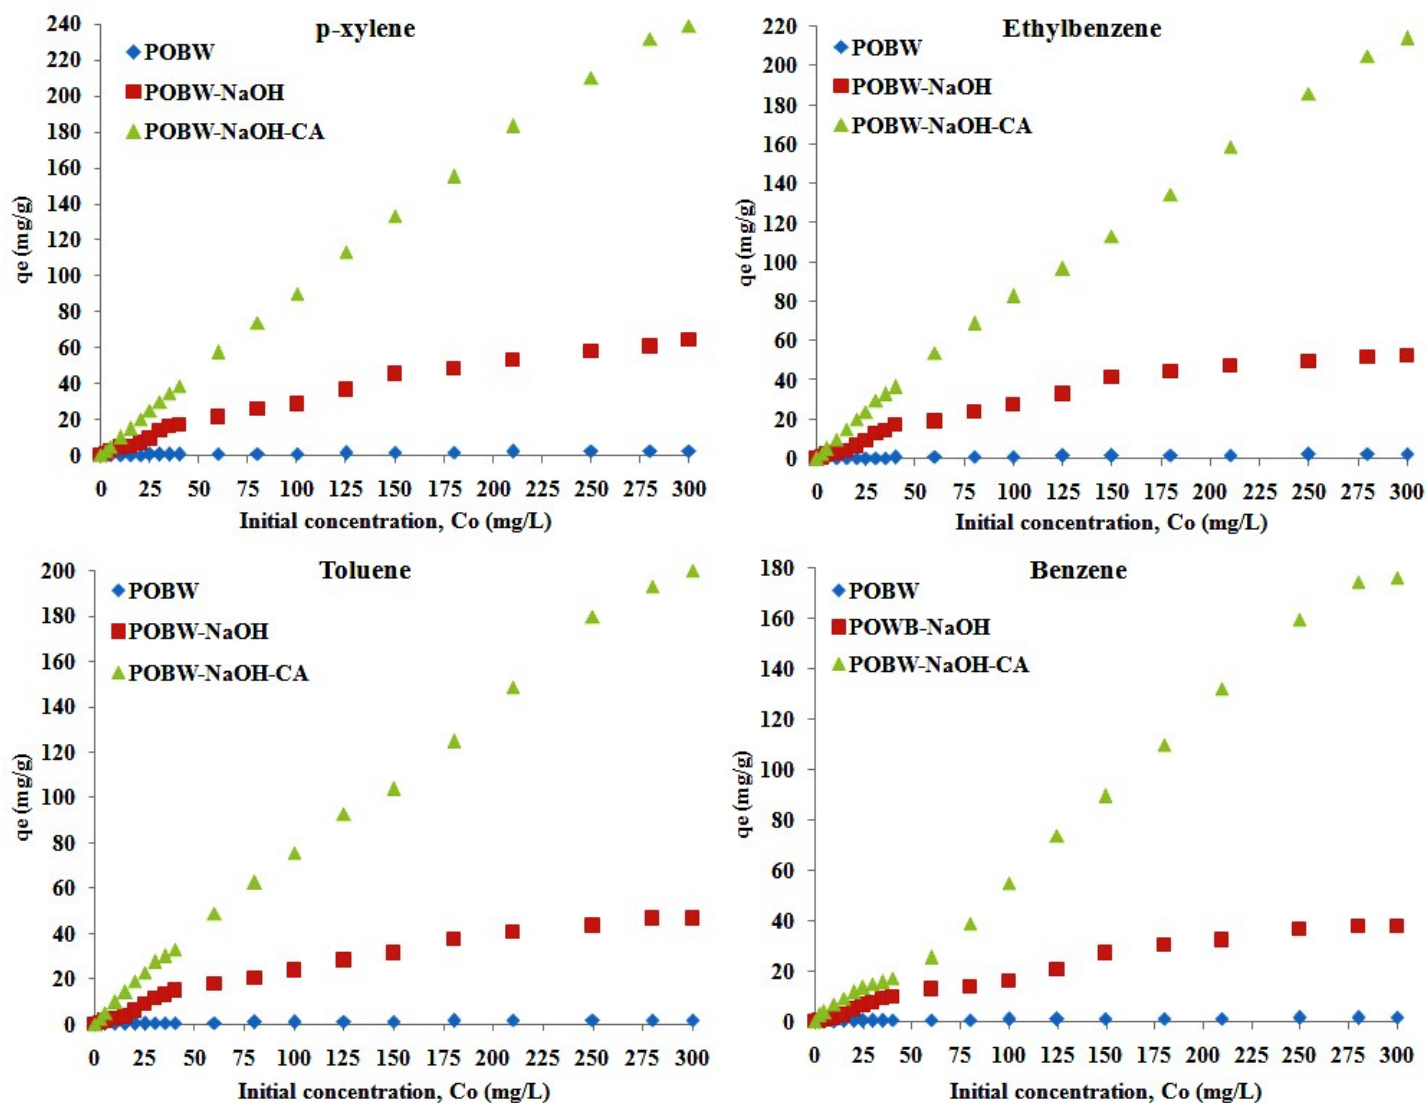

Fig. S2. Effect of initial concentrations for the adsorption of BTEX on the bone samples at 25 °C.

Table S1. Adsorption isotherm and kinetics equations.

| Name                     | Equation*                               |
|--------------------------|-----------------------------------------|
| Langmuir                 | $q_e = \frac{q_m K_L C_e}{1 + K_L C_e}$ |
| Freundlich               | $q_e = K_F C_e^{1/n}$                   |
| Pseudo-first-order       | $q_t = q_e [1 - \exp(-k_1 t)]$          |
| Pseudo-second-order      | $q_t = k_2 q_e^2 t / 1 + k_2 q_e t$     |
| Intra-particle diffusion | $q_t = k_{int} t^{1/2}$                 |
| Initial adsorption rate  | $h = k_2 q_e^2$                         |

\*  $q_e$  (mg g<sup>-1</sup>) is the specific equilibrium amount of adsorbate,  $C_e$  (mg L<sup>-1</sup>) is the equilibrium concentration of adsorbate,  $q_m$  is the maximal adsorption capacity and  $K$  ( $K_L$  and  $K_{LF}$ ) (L mol<sup>-1</sup>) and  $n$  are empirical constants that indicate the extent of adsorption and the adsorption effectiveness, respectively.
